# Supplementary material
Source: Springer Nature journal article supplement (https://www.springermedizin.de/resource/supplementary/12880_2012_187_MOESM7_ESM.pdf/9450186)

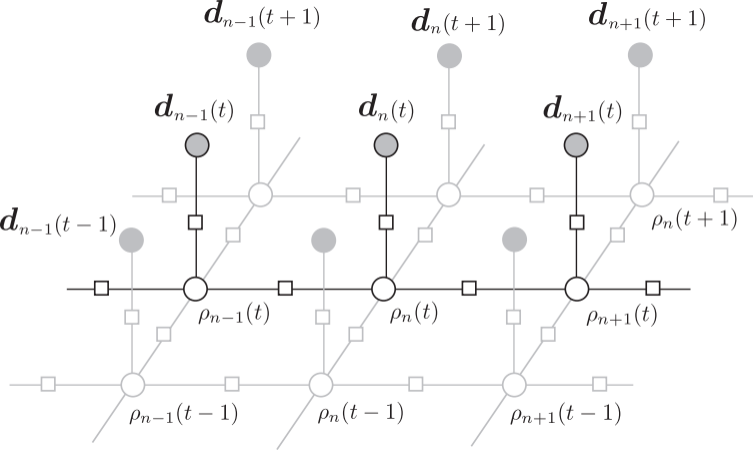

Supplement: MOESM7 [file 9450186]
